# Supplementary material for: A new I3O93− group constructed from IO3− and IO55− anion units in Cs3[Ga2O(I3O9)(IO3)4(HIO3)]
Source: Royal Society of Chemistry journal article supplement (doi:10.1039/d1ce01234g), 2021-11-11
Supplement: d1ce01234g1.pdf [file d1ce01234g1.pdf]

## Supporting Information

### **A new $\text{I}_3\text{O}_9^{3-}$ group constructed by $\text{IO}_3^-$ and $\text{IO}_5^{5-}$ anion units in $\text{Cs}_3[\text{Ga}_2\text{O}(\text{I}_3\text{O}_9)(\text{IO}_3)_4(\text{HIO}_3)]$**

Dandan Wang,<sup>a</sup> Xiaoqing Jiang,<sup>a</sup> Pifu Gong,<sup>b</sup> Xinyuan Zhang,<sup>\*, a</sup> Zheshuai Lin,<sup>b</sup> Zhanggui Hu<sup>\*, a</sup> and Yicheng Wu<sup>a</sup>

<sup>a</sup> Tianjin Key Laboratory of Functional Crystal Materials, Institute of Functional Crystals, Tianjin University of Technology, Tianjin 300384, China.

<sup>b</sup> Key Laboratory of Functional Crystals and Laser Technology, Beijing Center for Crystal Research and Development, Technical Institute of Physics and Chemistry, Chinese Academy of Sciences, Beijing 100190, China.

## Contents.

**Table S1.** Fractional atomic coordinates ( $\times 10^4$ ) and equivalent isotropic displacement parameters ( $\text{\AA}^2 \times 10^3$ ) of  $\text{Cs}_3[\text{Ga}_2\text{O}(\text{I}_3\text{O}_9)(\text{IO}_3)_4(\text{HIO}_3)]$  (**CGIO**).

**Table S2.** Selected bond lengths ( $\text{\AA}$ ) and calculated bond order ( $e$ ) of  $\text{Cs}_3[\text{Ga}_2\text{O}(\text{I}_3\text{O}_9)(\text{IO}_3)_4(\text{HIO}_3)]$  (**CGIO**).

**Table S3.** Selected bond angles ( $^\circ$ ) of  $\text{Cs}_3[\text{Ga}_2\text{O}(\text{I}_3\text{O}_9)(\text{IO}_3)_4(\text{HIO}_3)]$  (**CGIO**).

**Figure S1.** The EDS spectrum of **CGIO**.

**Figure S2.** The coordination environments of Cs1 atom and Cs2 atom of crystal **CGIO**.

**Figure S3.** The TG and DTA curves of **CGIO**.

**Figure S4.** The IR spectrum of **CGIO**.

**Figure S5.** The Raman spectrum of **CGIO**.

## 1. Supplementary Tables.

**Table S1.** Fractional atomic coordinates ( $\times 10^4$ ) and equivalent isotropic displacement parameters ( $\text{\AA}^2 \times 10^3$ ) of  $\text{Cs}_3[\text{Ga}_2\text{O}(\text{I}_3\text{O}_9)(\text{IO}_3)_4(\text{HIO}_3)]$  (**CGIO**).

| Atom | x          | y         | z         | $U_{(\text{eq})}^a$ |
|------|------------|-----------|-----------|---------------------|
| I1   | 5103.8(6)  | 2500      | 3106.2(6) | 6.61(12)            |
| I2   | 2485.8(5)  | 3862.0(2) | 3689.7(5) | 7.51(10)            |
| I3   | 7418.2(5)  | 4483.9(2) | 3774.8(5) | 7.97(11)            |
| I4   | 8025.8(5)  | 4518.7(2) | 9072.5(4) | 6.48(10)            |
| I5   | 10259.4(6) | 2500      | 6011.2(6) | 7.12(12)            |
| Cs1  | 9061.3(8)  | 2500      | 709.8(8)  | 21.23(15)           |
| Cs2  | 3356.8(5)  | 3811.5(2) | 976.3(5)  | 15.38(11)           |
| Ga1  | 6964.4(8)  | 3378.3(3) | 6322.7(8) | 6.04(14)            |
| O1   | 5234(9)    | 2500      | 1118(8)   | 18.6(14)            |
| O2   | 2743(6)    | 3328(2)   | 2164(6)   | 17.1(9)             |
| O3   | 6795(5)    | 3140(2)   | 4064(5)   | 9.7(8)              |
| O4   | 615(6)     | 3487(2)   | 4014(6)   | 19.1(10)            |
| O5   | 4312(6)    | 3572(2)   | 5558(5)   | 13.2(9)             |
| O6   | 5009(7)    | 4549(3)   | 2863(7)   | 24.4(11)            |
| O7   | 7624(6)    | 4249(2)   | 5883(6)   | 13.8 (9)            |
| O8   | 8067(8)    | 5295(2)   | 4194(7)   | 22.6(11)            |
| O9   | 7240(5)    | 36980(19) | 8514(5)   | 8.1(8)              |
| O10  | 10365(6)   | 4342(2)   | 10311(6)  | 19.7(10)            |
| O11  | 7084(7)    | 4633(2)   | 10626(6)  | 20.8(10)            |
| O12  | 9557(5)    | 3132(2)   | 7102(5)   | 11.1 (8)            |
| O13  | 12626(8)   | 2500      | 7221(9)   | 15.9(13)            |
| O14  | 6283(9)    | 2500      | 6768(7)   | 4.6(14)             |
| H13  | 13800(2)   | 2500      | 7300(7)   | 300(3)              |

$^a U_{(\text{eq})}$  is defined as one-third of the trace of the orthogonalized  $U_{ij}$  tensor.

**Table S2.** Selected bond lengths (Å) and calculated bond order (e) of Cs<sub>3</sub>[Ga<sub>2</sub>O(I<sub>3</sub>O<sub>9</sub>)(IO<sub>3</sub>)<sub>4</sub>(HIO<sub>3</sub>)] (CGIO).

| Bond                | Bond length | Bond order |
|---------------------|-------------|------------|
| I1-O1               | 1.764(6)    | 0.40       |
| I1-O2               | 2.469(4)    | 0.04       |
| I1-O2 <sup>1</sup>  | 2.469(4)    | 0.04       |
| I1-O3               | 1.867(4)    | 0.17       |
| I1-O3 <sup>1</sup>  | 1.867(4)    | 0.17       |
| I2-O2               | 1.806(4)    | 0.27       |
| I2-O4               | 1.791(4)    | 0.32       |
| I2-O5               | 1.833(4)    | 0.27       |
| I3-O6               | 1.780(5)    | 0.35       |
| I3-O7               | 1.842(4)    | 0.17       |
| I3-O8               | 1.786(5)    | 0.32       |
| I4-O9               | 1.845(4)    | 0.17       |
| I4-O10              | 1.804(5)    | 0.27       |
| I4-O11              | 1.781(4)    | 0.35       |
| I5-O12              | 1.837(4)    | 0.27       |
| I5-O12 <sup>1</sup> | 1.837(4)    | 0.27       |
| I5-O13              | 1.777(6)    | 0.35       |
| Ga1-O3              | 1.978(4)    | 0.52       |
| Ga1-O5              | 1.997(4)    | 0.18       |
| Ga1-O7              | 1.987(4)    | 0.29       |
| Ga1-O9              | 1.951(4)    | 0.61       |
| Ga1-O12             | 1.979(4)    | 0.28       |
| Ga1-O14             | 2.009(3)    | 0.13       |

**Table S3.** Selected bond angles (°) of Cs<sub>3</sub>[Ga<sub>2</sub>O(I<sub>3</sub>O<sub>9</sub>)(IO<sub>3</sub>)<sub>4</sub>(HIO<sub>3</sub>)] (**CGIO**).

| Angle                               | (°)        |
|-------------------------------------|------------|
| O1-I1-O3                            | 89.27(19)  |
| O1-I1-O2 <sup>1</sup>               | 89.27(19)  |
| O1-I1-O3                            | 98.3(2)    |
| O1-I1-O3 <sup>1</sup>               | 98.3(2)    |
| O2 <sup>1</sup> -I1-O2              | 90.2(2)    |
| O3-I1-O2                            | 88.02(17)  |
| O3-I1-O2 <sup>1</sup>               | 172.26(17) |
| O3 <sup>1</sup> -I1-O2              | 172.26(17) |
| O3 <sup>1</sup> -I1-O2 <sup>1</sup> | 88.02(17)  |
| O3-I1-O3 <sup>1</sup>               | 92.7(3)    |
| O2-I2-O5                            | 100.0(2)   |
| O4-I2-O2                            | 99.3(2)    |
| O4-I2-O5                            | 98.1(2)    |
| O6-I3-O7                            | 98.6(2)    |
| O6-I3-O8                            | 101.4(3)   |
| O8-I3-O7                            | 98.2(2)    |
| O10-I4-O9                           | 97.7(2)    |
| O11-I4-O10                          | 101.7(2)   |
| O11-I4-O9                           | 97.5(2)    |
| O12 <sup>1</sup> -I5-O12            | 93.2(3)    |
| O13-I5-O12 <sup>1</sup>             | 98.6(2)    |
| O13-I5-O12                          | 98.6(2)    |

## 2. Supplementary Figures.

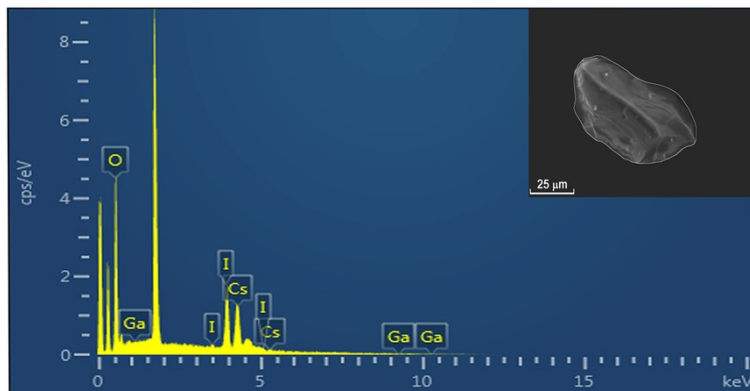

**Figure S1.** The EDS spectrum of CGIO.

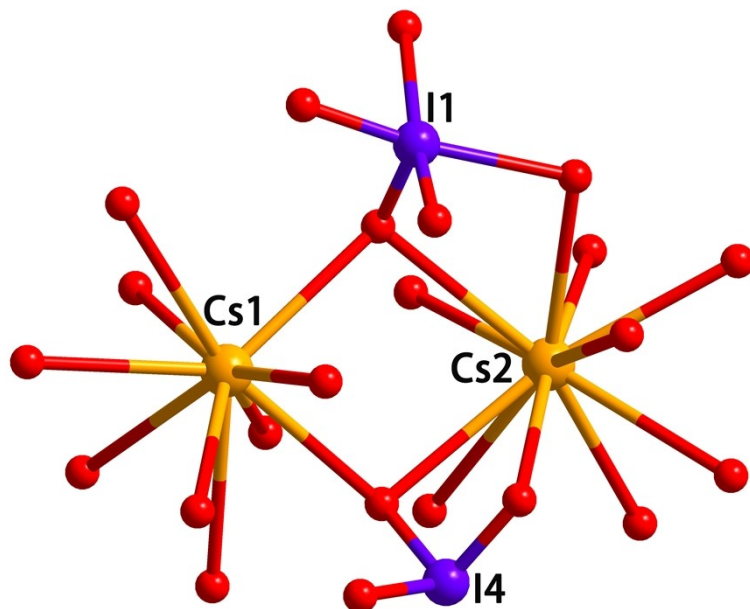

**Figure S2.** The coordination environments of Cs1 atom and Cs2 atom of crystal **CGIO**.

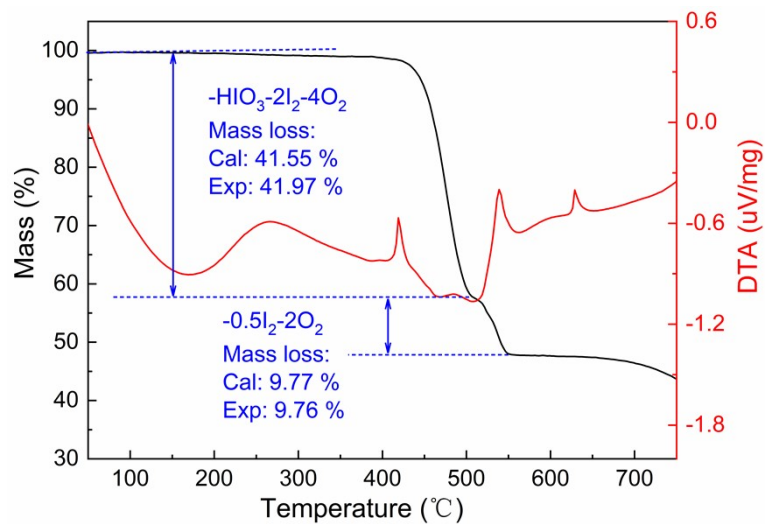

**Figure S3.** The TG and DTA curves of **CGIO**.



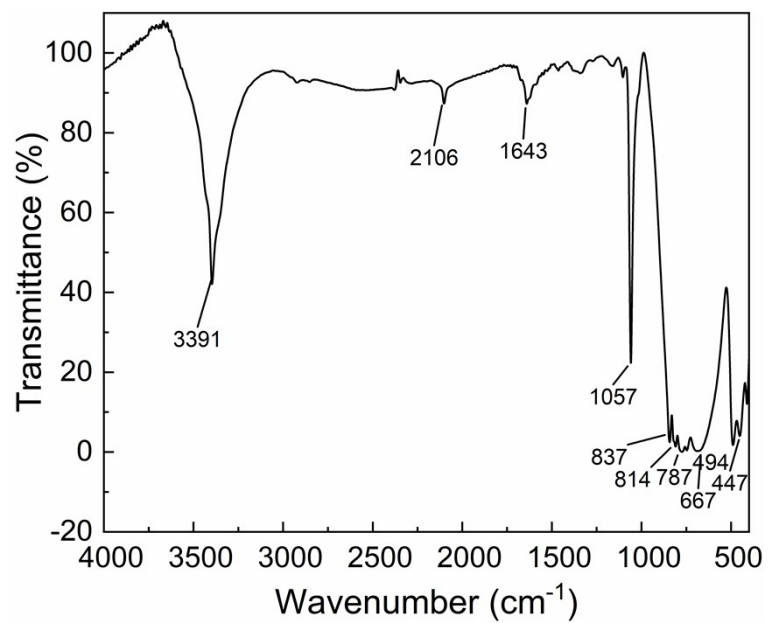

**Figure S4.** The IR spectrum of CGIO.

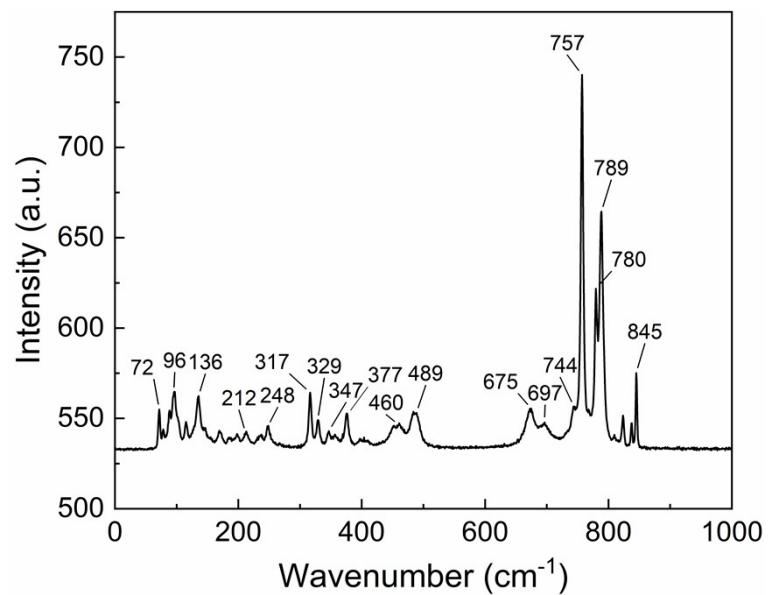

**Figure S5.** The Raman spectrum of **CGIO**.
